# Supplementary material for: Modulating membrane fusion through the design of fusogenic DNA circuits and bilayer composition
Source: Royal Society of Chemistry journal article supplement (doi:10.1039/d2sm00863g), 2022-01-01
Supplement: d2sm00863g1.pdf [file d2sm00863g1.pdf]

## **ELECTRONIC SUPPLEMENTARY INFORMATION**

### **Modulating membrane fusion through the design of fusogenic DNA circuits and bilayer composition**

Miguel Paez-Perez,<sup>a,b</sup> I Alasdair Russell<sup>c</sup>, Pietro Cicuta<sup>d</sup> and Lorenzo Di Michele<sup>\*a,b,d</sup>

*a. Molecular Sciences Research Hub, Department of Chemistry, Imperial College London,  
Wood Lane, London, W12 0BZ, UK*

*b. fabriCELL, Imperial College London, Wood Lane, London, W12 0BZ, UK*

*c. Cancer Research UK Cambridge Institute, University of Cambridge, Cambridge CB2 0RE, UK*

*d. Biological and Soft Systems, Cavendish Laboratory, University of Cambridge, Cambridge CB3 0HE, UK*

## Experimental methods:

### Materials:

Lipids solutions in  $\text{CHCl}_3$  of 1,2-dioleoyl-sn-glycero-3-phosphocholine (DOPC), 1-palmitoyl-2-oleoyl-glycero-3-phosphocholine (POPC), 1,2-diphytanoyl-sn-glycero-3-phosphocholine (DPhPC), 1,2-dilauroyl-sn-glycero-3-phosphocholine (DLPC), 1,2-dimyristoyl-sn-glycero-3-phosphocholine (DMPC), 1,2-dipalmitoyl-sn-glycero-3-phosphocholine (DPPC), 1,2-distearoyl-sn-glycero-3-phosphocholine (DSPC), 1,2-diarachidoyl-sn-glycero-3-phosphocholine (DAPC), 1,2-dioleoyl-sn-glycero-3-phosphoethanolamine (DOPE), 1-palmitoyl-2-oleoyl-sn-glycero-3-phosphoethanolamine (POPE) and 1-palmitoyl-2-oleoyl-sn-glycero-3-phosphate (sodium salt) (POPA) were purchased from Avanti Polar Lipids®. Laurdan was obtained from ThermoFisher, and dissolved in  $\text{CHCl}_3$  to prepare a  $300\mu\text{M}$  stock solution. RP-HPLC purified cholesterol-modified DNA (Table S1) and unmodified DNA oligonucleotides were provided by Eurogentec and IDT, respectively, and resuspended in Tris EDTA (TE) buffer (pH 8) to a  $100\mu\text{M}$  final concentration. All other reagents were purchased from Sigma Aldrich® or VWR and used without further purification.

### Tendril annealing:

The fusogenic DNA nanostructures (*tendrils*) were prepared by mixing equimolar amounts of the corresponding oligonucleotides (Table S2) to a final concentration of  $10\mu\text{M}$  (*i.e.* individual oligo concentration) in  $100\text{mM}$  NaCl TE (pH 7.4). The mixture was then annealed by heating to  $95^\circ\text{C}$  and then cooling at a rate of  $-0.5^\circ\text{C}/\text{min}$  to a temperature of  $15^\circ\text{C}$ .

### Large Unilamellar Vesicle (LUV) formation:

Lipids dissolved in  $\text{CHCl}_3$  were mixed to the appropriate molar ratio (Table S3) and, for labelled *L* liposomes, either Rhodamine-PE and NBD-PE (1% mol each) or Laurdan (1% mol) were added. The organic solvent was then removed using a rotatory evaporator to create a lipid film, which was then dried overnight under vacuum. Afterwards, it was hydrated by adding  $100\text{mM}$  NaCl TE buffer (pH 7.4) to a final concentration of  $2\text{mg}/\text{mL}$  total lipid and vortexed until the solution turned cloudy and the lipid film could no longer be seen. We notice resuspension of DPhPC/DOPE/Chol and DOPC/OA/Chol films required one freeze-thaw cycle. This suspension was then extruded 15 times (above the transition temperature of the lipid with the highest  $T_m$ ) through a  $100\text{nm}$  polycarbonate filter (Avanti Polar Lipids®).

In the case of content mixing assay, vesicles were resuspended in either  $15\text{mM}$   $\text{TbCl}_3$ ,  $150\text{mM}$  sodium citrate,  $5\text{mM}$  NaCl,  $10\text{mM}$  Tris or  $150\text{mM}$  DPA,  $25\text{mM}$  NaCl,  $10\text{mM}$  Tris buffer, for *L* and *U* liposomes, respectively. The pH of both buffers was adjusted to  $\sim 7$ , and freeze-thawing was performed to improve the encapsulation efficiency. After extrusion, the loaded LUVs were purified using a NAP-10 size exclusion column.

### LUV functionalization with DNA tendrils:

Vesicle decoration was performed by mixing labelled (*L*) ( $5\mu\text{L}$ ,  $2\text{mg}/\text{mL}$  lipid) and unlabelled (*U*) ( $15\mu\text{L}$ ,  $2\text{mg}/\text{mL}$ ) LUVs with the tendrils ( $T_L$ :  $7.62\mu\text{L}$ ,  $10\mu\text{M}$  and  $T_U$ :  $5.49\mu\text{L}$ ,  $10\mu\text{M}$  respectively), which resulted in an estimated tendril:vesicle ratio of 200:1 and 50:1 respectively. These solutions were further diluted in  $100\text{mM}$  NaCl TE (pH 7.4) buffer to achieve a final lipid concentration of  $0.5\text{mg}/\text{mL}$ , and the mixture was incubated overnight at room temperature before use.

### Fluorescence spectra and kinetics measurements:

In a NUNC-96 well plate,  $100\mu\text{L}$   $100\text{mM}$  NaCl TE (pH 7.4) and  $4\mu\text{L}$  of *L* vesicles ( $0.5\text{mg}/\text{mL}$ ) were mixed with  $16\mu\text{L}$  of *U* liposomes ( $0.5\text{mg}/\text{mL}$ ). The fusion kinetics were then recorded using a BMG CLARIOstar Plus plate reader at  $530\pm 10\text{nm}$  and  $590\pm 10\text{nm}$  emission after  $465\pm 10\text{nm}$  excitation (NBD/Rh FRET) or  $435\pm 10\text{nm}$  and  $490\pm 10\text{nm}$  emission under  $360\pm 10\text{nm}$  nm excitation (Laurdan). In the case of FRET experiments,  $4\mu\text{L}$  of 2% Triton-X detergent were added and the measured NBD and Rh intensities were used as the *infinite-dilution* values.

The extent of lipid mixing ( $E_{mixing}$ ) was quantified as:

$$E_{mixing} = \frac{\varepsilon(t) - \varepsilon_0}{\varepsilon_{TX} - \varepsilon_0} \quad (1)$$

where  $\varepsilon(t)$  is the FRET efficiency at time  $t$ ,  $\varepsilon_0$  is the FRET efficiency at  $t=0$  and  $\varepsilon_{TX}$  is the FRET efficiency after LUV disruption using detergent Triton-X. In all cases, the FRET efficiency  $\varepsilon$  was approximated from the donor ( $I_D$ ) and acceptor ( $I_A$ ) intensities as:

$$\varepsilon = \frac{I_A}{I_D + I_A} \quad (2)$$

We note  $E_{mixing}$  is not an actual measure of the fusion progress. First, the described FRET assay is sensitive to lipid mixing between the leaflets of different vesicles, but this may not necessarily lead to full fusion (*i.e.* content mixing). Secondly, previous work has highlighted the effect of membrane structure and detergent use in the extent of fluorophore dequenching upon solubilization of the membrane<sup>1</sup> and, lastly, FRET assays are dependent on the distance between the fluorescent dyes, which in turn will be dictated by the degree of lipid packing and/or the area per lipid. Therefore, proper quantification of lipid mixing would require individual calibrations for each individual  $L/U$  combination. However, such approach was deemed unfeasible due to the large number of lipid compositions used in this work.

When Laurdan was used, the lipid ordering of the membrane was evaluated through the General Polarization (GP) function defined as:

$$GP = \frac{I_{435\pm 2} - I_{490\pm 2}}{I_{435\pm 2} + I_{490\pm 2}} \quad (3)$$

Kinetic and fixed-time data is presented as mean  $\pm$  s.d. for  $n \geq 3$ .

For the content mixing assay, the samples were placed in a 50 $\mu$ L low-volume quartz cuvette instead, and Tb(DPA)<sub>3</sub> fluorescence intensity was measured using a Horiba Yvon Fluoromax 4 fluorimeter under 260 $\pm$ 3nm excitation and 544 $\pm$ 3nm emission ( $n=1$ ).

#### Giant Unilamellar Vesicle (GUV) formation:

30 $\mu$ L of a 1mg/mL lipid solution with the indicated composition (Table S4) was spread onto an ITO slide. After drying for >1h under vacuum, a PDMS spacer was pressed onto the slide, the chamber was filled with a 400mM sucrose solution and was then closed with a second ITO slide. The electroformation protocol consisted of the application of 1Vpp@10Hz electric field for 90 min, followed by a 30 min detachment phase at 1Vpp@2Hz. The resulting GUVs were recovered by gently tilting the glass slide (to avoid GUV bursting due to shear exerted during pipette aspiration).

GUVs were then diluted ten-fold before imaging (using a custom-made PDMS chamber on top of a BSA-coated glass slide).

#### Small angle X-Ray Scattering experiments:

Dry samples of a given lipid mixture (20mg total mass) were hydrated with DI water to 70% and subjected to 15 freeze-thaw cycles to ensure a proper lipid mixing. The sample was then loaded into a 2mm diameter polymer capillary tube and sealed with a rubber stopper. SAXS measurements were performed at beamline I22 (Diamond Light Source, UK).<sup>2</sup> The diffraction profiles were obtained from the radial integration of the 2D SAXS patterns, and peak position and width was determined by fitting them to pseudo-Voigt functions using a custom-built MATLAB® script.

**Note on the lipid parameters presented in Fig. 3d-f:**

The area per lipid and membrane thickness values were obtained from Kučerka et al.<sup>3,4</sup> and/or from Sun et al.<sup>5</sup> DEPC parameters were derived from our own measurements. The values for lipid curvature (DOPC, POPE, DOPE) were extracted from Kollmitzer et al.<sup>6</sup> In the case of POPA, the spontaneous curvature was approximated from that of DOPA<sup>7</sup>, and then corrected as:

$$J_0^{POPA} = J_0^{DOPA} \frac{J_0^{POPE}}{J_0^{DOPE}} \quad (4)$$

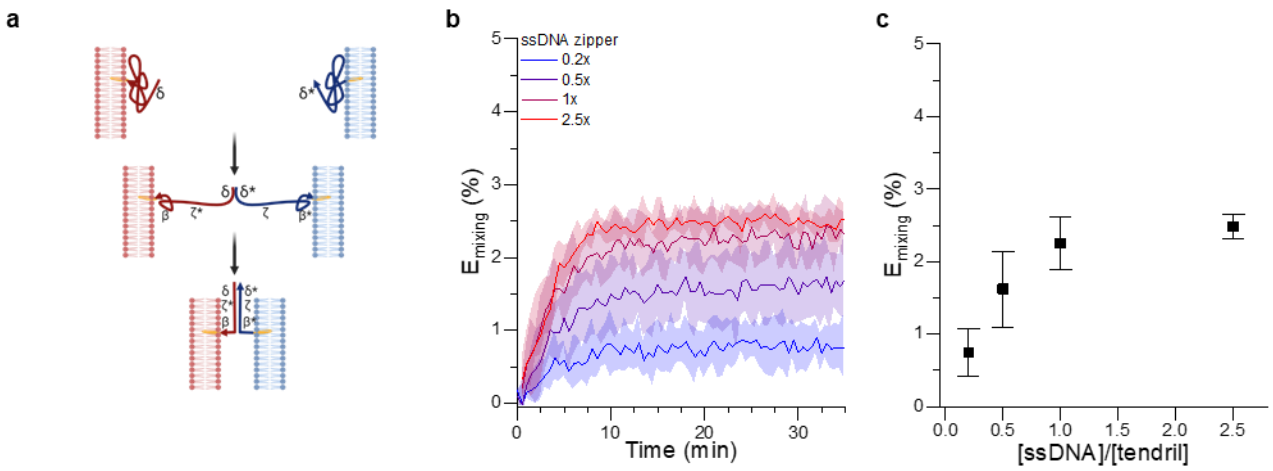

**Fig. S1 | Fusion-induced lipid mixing efficiency using a single-strand DNA zippers.** **a)** Plausible pathway leading to zipping of ssDNA constructs, initially coiled up. **b)** Kinetic traces showing mixing at a range of zipper concentrations expressed as fractions of the concentration of tendrils used throughout this work (1x, corresponding to 200 fusogenic DNA structures per *L* LUV and 50 fusogenic DNA structures per *U* LUV). **c)**  $E_{mixing}$  after 35 minutes from the beginning to the experiment as a function of zipper concentration. 1x represents the standard coverage used throughout this work. Both *L* and *U* LUVs had a 50/25/25 DOPC/DOPE/Chol composition.

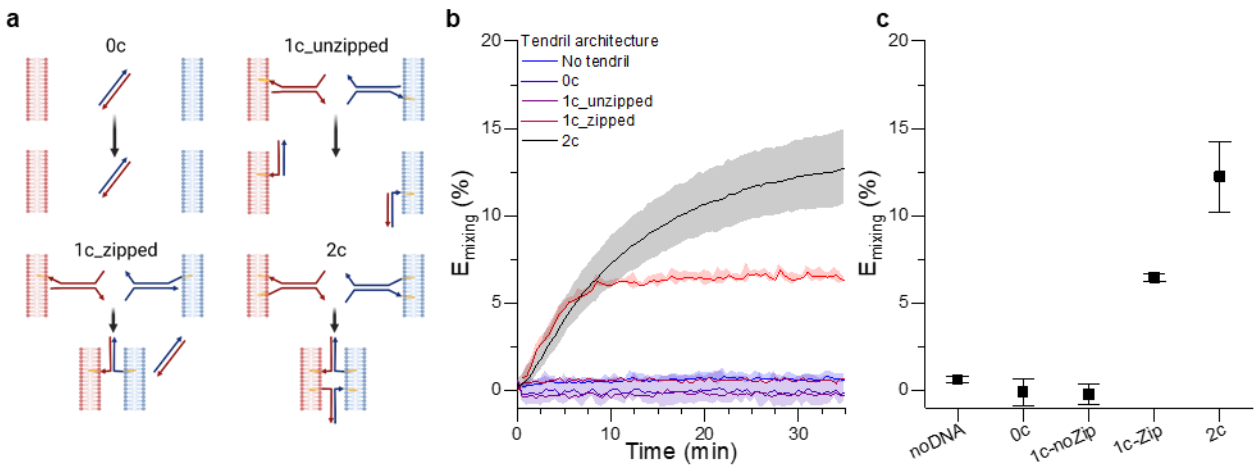

**Fig. S2 | Effect of tendril architecture on lipid mixing efficiency.** **a)** DNA construct binding and (possible) consequent membrane fusion for various control design used in this work. Design 2c is the “standard” tendril, with two cholesterol anchors on each construct. Design 1c\_zipped has a single cholesterol moiety on each tendril, but two cholesterolised ssDNA in the two tendrils are complementary, leading to membrane-membrane binding and zipping action. Tendrils with 1c\_unzipped design have a single cholesterol on non-complementary ssDNA elements, so no zipping and permanent membrane binding is possible. Design 0c lacks cholesterol moieties and does not bind to the bilayers. **b)** Kinetic traces showing  $E_{mixing}$  for different tendril designs. **c)**  $E_{mixing}$  at 35 minutes. Both *L* and *U* LUVs had a 50/25/25 DOPC/DOPE/Chol composition.

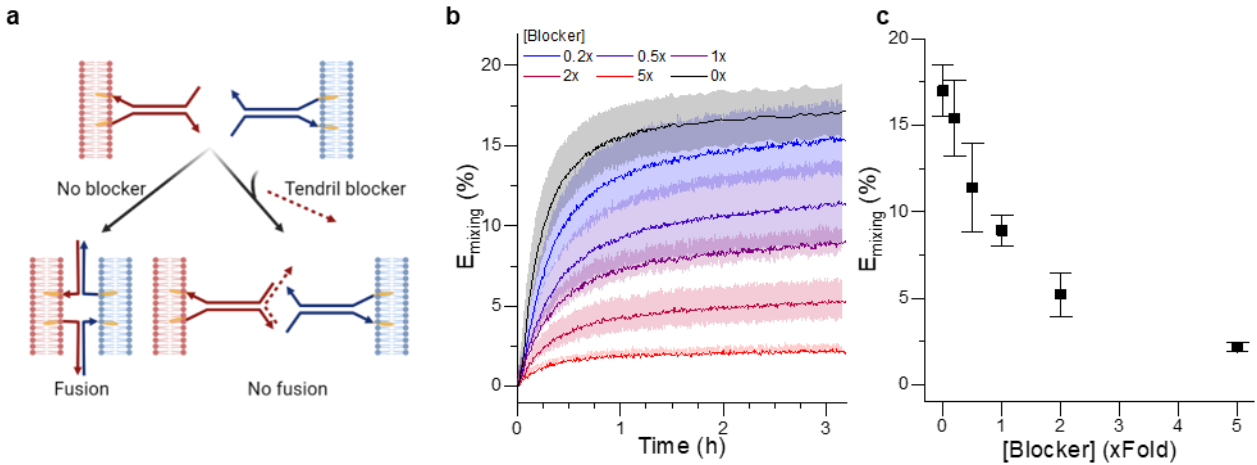

**Fig. S3 | Effect of blocker concentration on lipid mixing efficiency.** a) Blocker addition hinders the interaction between sticky ends on the tendrils, this preventing fusion. b) Kinetic traces showing  $E_{mixing}$  for increasing blocker concentration. c)  $E_{mixing}$  at 3h as a function of blocker concentration. Both donor and acceptor LUVs had a 50/25/25 DOPC/DOPE/Chol composition.

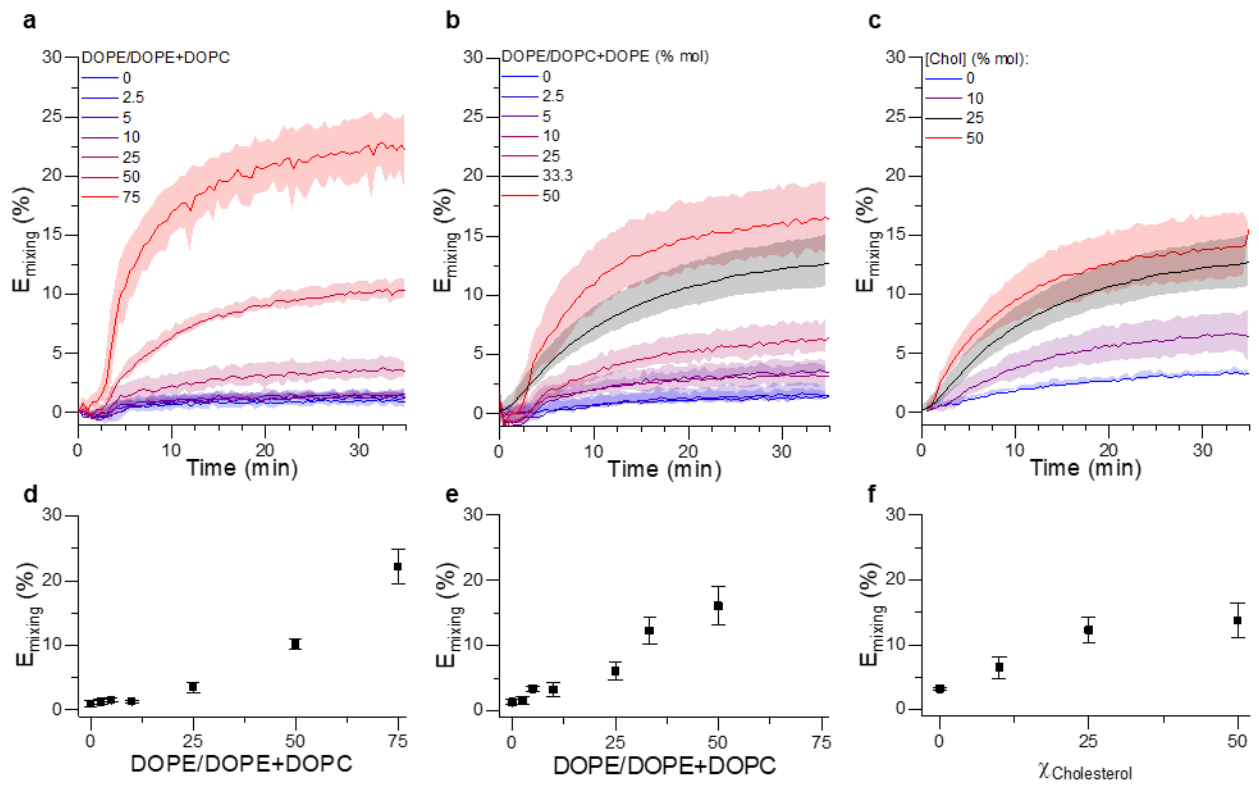

**Fig. S4 | Effect of DOPE and cholesterol concentration on fusion-induced lipid mixing efficiency.** a-c) Kinetic traces for  $E_{mixing}$  and d-f)  $E_{mixing}$  at 35 minutes. for a,d) L LUVs with a  $\chi_{DOPE}/1-\chi_{DOPE}$  composition; b,e)  $50-\chi_{DOPE}/\chi_{DOPE}/25$  DOPC/DOPE/Chol composition and c,f)  $50-0.5\chi_{Chol}/25-0.5\chi_{Chol}/\chi_{Chol}$  composition. Composition of all U LUVs was 50/25/25 DOPC/DOPE/Chol.

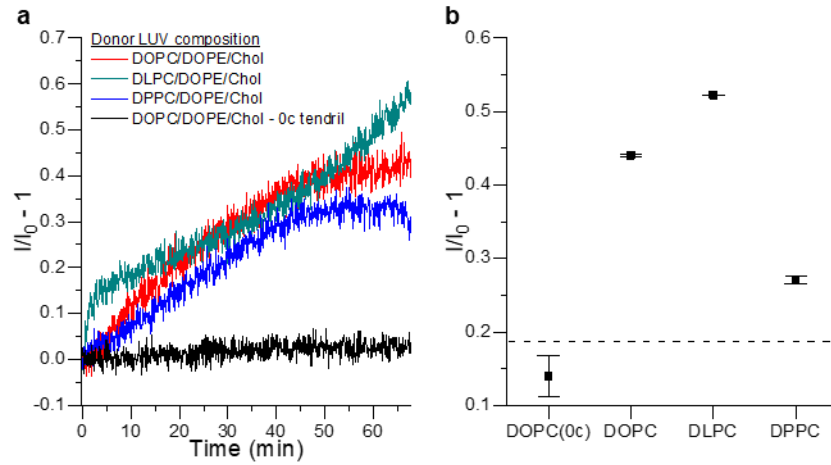

**Fig. S5 | Tb/DPA content mixing assay.** **a)** Kinetic traces showing the increase of DPA fluorescence ( $I_{544}$ ) upon incubation of *L* vesicles of varied composition with DOPC/DOPE/Chol *U* liposomes. **b)** Change in DPA fluorescence intensity as a function of the lamellar lipid of the donor vesicle, calculated from the 490nm and 544nm DPA emission peaks. Symbols represent the mean, error bars the standard deviations of the intensity change corresponding to the two emission bands.

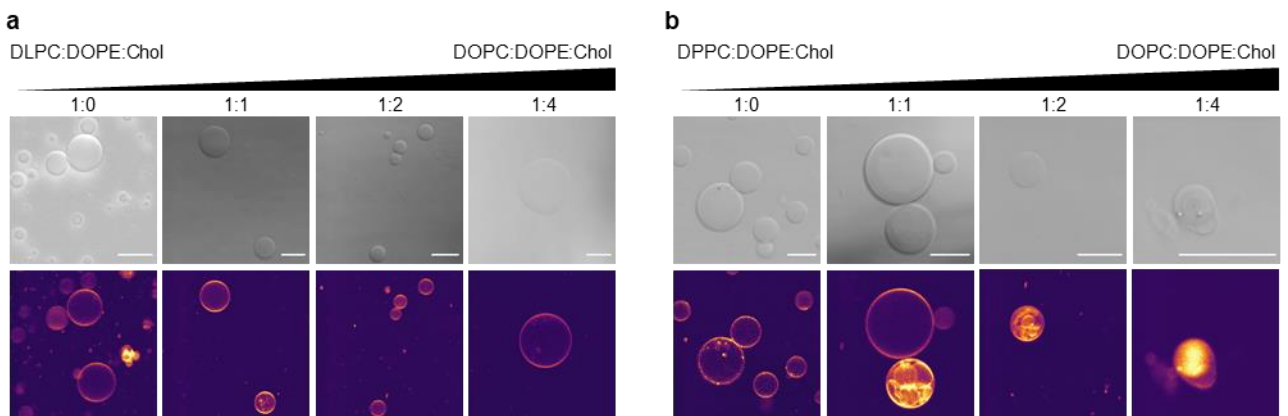

**Fig. S6 | Microscopy characterization of anomalous fusion products.** **a)** Brightfield and confocal microscopy images of GUVs at increasing DLPC/DOPE/Chol to DOPC/DOPE/Chol ratio. **b)** Brightfield and confocal microscopy images of GUVs at increasing DPPC/DOPE/Chol to DOPC/DOPE/Chol ratio. Scalebar: 20µm. See Table S4 for detailed composition.

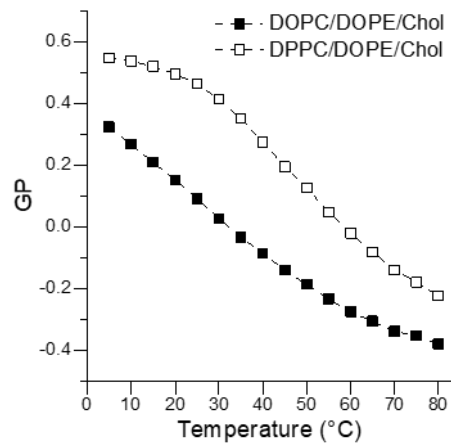

**Fig. S7 | Change in Laurdan GP at increasing temperature.** The change in gradient observed for the DPPC/DOPE/Chol composition suggests a  $L_o \rightarrow L_\alpha$  transition, while not such change is observed for DOPC/DOPE/Chol membranes, indicating they are in the  $L_\alpha$  phase at 25°C.



**Supplementary Table S1: DNA sequences**

| Name                   | Sequence (5'→3')                                               |
|------------------------|----------------------------------------------------------------|
| T <sub>L1</sub>        | GCCACTTCACCCGACCATTCTGGCCGTTGCGCTCGTGAAAGTAGC                  |
| T <sub>L1_cho13</sub>  | GCCACTTCACCCGACCATTCTGGCCGTTGCGCTCGTGAAAGTAGC-TEG-Cholesteryl  |
| T <sub>L2</sub>        | CGAGTAAGGGCGAGCGCAACGGCCAGAATGGTTCGGTCACTCAAAC                 |
| T <sub>L2_cho15</sub>  | Cholesteryl-TEG-CGAGTAAGGGCGAGCGCAACGGCCAGAATGGTTCGGTCACTCAAAC |
| T <sub>U1</sub>        | GCTACTTTCACGAGCGCAACGGCCAGAATGGTTCGGGTGAAGTGGC                 |
| T <sub>U1_cho15</sub>  | Cholesteryl-TEG-GCTACTTTCACGAGCGCAACGGCCAGAATGGTTCGGGTGAAGTGGC |
| T <sub>U2</sub>        | GTTTGAGTGACCGACCATTCTGGCCGTTGCGCTCGCCCTTACTCG                  |
| T <sub>U2_cho13</sub>  | GTTTGAGTGACCGACCATTCTGGCCGTTGCGCTCGCCCTTACTCG-TEG-Cholesteryl  |
| db-T <sub>L</sub> (0)  | GTTTGAGTGACCGGGTGAAGTGGC                                       |
| db-T <sub>U</sub> (0)  | GCCACTTCACCCGGTCACTCAAAC                                       |
| db-T <sub>L</sub> (4)  | ATGAGTTTGAGTGACCGGGTGAAGTGGCTGCT                               |
| db-T <sub>U</sub> (4)  | AGCAGCCACTTCACCCGGTCACTCAAACATCAT                              |
| db-T <sub>L</sub> (6)  | GGATGAGTTTGAGTGACCGGGTGAAGTGGCTGCTGT                           |
| db-T <sub>U</sub> (6)  | ACAGCAGCCACTTCACCCGGTCACTCAAACATCATCC                          |
| db-T <sub>L</sub> (8)  | GCGGATGAGTTTGAGTGACCGGGTGAAGTGGCTGCTGTCT                       |
| db-T <sub>U</sub> (8)  | AGACAGCAGCCACTTCACCCGGTCACTCAAACATCATCCG                       |
| db-T <sub>L</sub> (10) | CTGCGGATGAGTTTGAGTGACCGGGTGAAGTGGCTGCTGTCTGG                   |
| db-T <sub>U</sub> (10) | CCAGACAGCAGCCACTTCACCCGGTCACTCAAACATCATCCGAG                   |
| db-T <sub>L</sub> (12) | TTCTGCGGATGAGTTTGAGTGACCGGGTGAAGTGGCTGCTGTCTGGAG               |
| db-T <sub>U</sub> (12) | CTCCAGACAGCAGCCACTTCACCCGGTCACTCAAACATCATCCGAGAA               |
| b-T <sub>L</sub>       | GTTTGAGTGACCGGGTGAAGTGGCTGCTGTCTGGAG                           |
| ub-T <sub>L</sub>      | CTCCAGACAGCAGCCACTTCACCCGGTCACTCAAAC                           |

**Supplementary Table S2: DNA sequences used to assemble each tendril**

| Name                                                         | DNA strands                                                           |
|--------------------------------------------------------------|-----------------------------------------------------------------------|
| <i>Standard tendrils</i>                                     |                                                                       |
| T <sub>L</sub> – 0c                                          | T <sub>L1</sub> , T <sub>L2</sub>                                     |
| T <sub>L</sub> – 1c unzipped                                 | T <sub>L1_cho13</sub> , T <sub>L2</sub>                               |
| T <sub>L</sub> – 1c zipped                                   | T <sub>L1_cho13</sub> , T <sub>L2</sub>                               |
| T <sub>L</sub> – 2c (T <sub>L</sub> unless otherwise stated) | T <sub>L1_cho13</sub> , T <sub>L2_cho15</sub>                         |
| T <sub>U</sub> – 0c                                          | T <sub>U1</sub> , T <sub>U2</sub>                                     |
| T <sub>U</sub> – 1c unzipped                                 | T <sub>U1</sub> , T <sub>U2_cho13</sub>                               |
| T <sub>U</sub> – 1c zipped                                   | T <sub>U1_cho15</sub> , T <sub>U2</sub>                               |
| T <sub>U</sub> – 2c (T <sub>U</sub> unless otherwise stated) | T <sub>U1_cho15</sub> , T <sub>U2_cho13</sub>                         |
| <i>Delayed tendrils</i>                                      |                                                                       |
| Delayed T <sub>L</sub>                                       | T <sub>L1_cho13</sub> , T <sub>L2_cho15</sub> , db-T <sub>L</sub> (n) |
| Delayed T <sub>U</sub>                                       | T <sub>U1_cho15</sub> , T <sub>U2_cho13</sub> , db-T <sub>U</sub> (n) |
| <i>Blocked tendrils</i>                                      |                                                                       |
| Blocked T <sub>L</sub>                                       | T <sub>L1_cho13</sub> , T <sub>L2_cho15</sub> , bT <sub>L</sub>       |

**Supplementary Table S3: Lipid composition of the LUVs used throughout the experiments.**

| ID                                            | Lamellar Lipid |                | Fusogenic Lipid |                | Sterol      |                | Notes |
|-----------------------------------------------|----------------|----------------|-----------------|----------------|-------------|----------------|-------|
|                                               | Lipid Name     | Molar fraction | Lipid Name      | Molar fraction | Lipid Name  | Molar fraction |       |
| <i>DOPE/DOPC ratio effect, no cholesterol</i> |                |                |                 |                |             |                |       |
| A0                                            | DOPC           | 100            | DOPE            | 0              | Cholesterol | 0              |       |
| A1                                            | DOPC           | 97.5           | DOPE            | 2.5            | Cholesterol | 0              |       |
| A2                                            | DOPC           | 95             | DOPE            | 5              | Cholesterol | 0              |       |
| A3                                            | DOPC           | 90             | DOPE            | 10             | Cholesterol | 0              |       |
| A4                                            | DOPC           | 75             | DOPE            | 25             | Cholesterol | 0              |       |
| A5                                            | DOPC           | 50             | DOPE            | 50             | Cholesterol | 0              |       |
| A6                                            | DOPC           | 25             | DOPE            | 75             | Cholesterol | 0              |       |

| <i>Effect of DOPE/DOPC ratio effect, 25%mol cholesterol</i> |       |        |      |       |             |    |                                                                                      |
|-------------------------------------------------------------|-------|--------|------|-------|-------------|----|--------------------------------------------------------------------------------------|
| B0                                                          | DOPC  | 75     | DOPE | 0     | Cholesterol | 25 |                                                                                      |
| B1                                                          | DOPC  | 73.125 | DOPE | 1.875 | Cholesterol | 25 |                                                                                      |
| B2                                                          | DOPC  | 71.25  | DOPE | 3.75  | Cholesterol | 25 |                                                                                      |
| B3                                                          | DOPC  | 67.5   | DOPE | 7.5   | Cholesterol | 25 |                                                                                      |
| B4                                                          | DOPC  | 56.25  | DOPE | 18.75 | Cholesterol | 25 |                                                                                      |
| B5                                                          | DOPC  | 37.5   | DOPE | 37.5  | Cholesterol | 25 |                                                                                      |
| <i>Cholesterol effect, 1:2 DOPE/DOPC ratio</i>              |       |        |      |       |             |    |                                                                                      |
| C0                                                          | DOPC  | 66.67  | DOPE | 33.33 | Cholesterol | 0  |                                                                                      |
| C1                                                          | DOPC  | 60     | DOPE | 30    | Cholesterol | 10 |                                                                                      |
| C2                                                          | DOPC  | 50     | DOPE | 25    | Cholesterol | 25 | Reference, used for U LUVs                                                           |
| C3                                                          | DOPC  | 33.33  | DOPE | 16.67 | Cholesterol | 50 |                                                                                      |
| <i>Lamellar lipid effect</i>                                |       |        |      |       |             |    |                                                                                      |
| D1                                                          | DLPC  | 50     | DOPE | 25    | Cholesterol | 25 |                                                                                      |
| D2                                                          | DMPC  | 50     | DOPE | 25    | Cholesterol | 25 |                                                                                      |
| D3                                                          | DPPC  | 50     | DOPE | 25    | Cholesterol | 25 |                                                                                      |
| D4                                                          | DSPC  | 50     | DOPE | 25    | Cholesterol | 25 |                                                                                      |
| D5                                                          | DAPC  | 50     | DOPE | 25    | Cholesterol | 25 |                                                                                      |
| D6                                                          | POPC  | 50     | DOPE | 25    | Cholesterol | 25 |                                                                                      |
| D7                                                          | DPhPC | 50     | DOPE | 25    | Cholesterol | 25 | Required Freeze-Thaw                                                                 |
| D8                                                          | DOPC  | 50     | DOPE | 25    | Cholesterol | 25 | Reference, used for U LUVs                                                           |
| D9                                                          | DEPC  | 50     | DOPE | 25    | Cholesterol | 25 |                                                                                      |
| <i>Fusogenic lipid effect</i>                               |       |        |      |       |             |    |                                                                                      |
| E1                                                          | DOPC  | 50     | DOPE | 25    | Cholesterol | 25 | Reference, used for U LUVs                                                           |
| E2                                                          | DOPC  | 37.5   | OA   | 37.5  | Cholesterol | 25 | 1:1 ratio of DOPC to OA to correct for the number of HC chains. Required Freeze-Thaw |
| E3                                                          | DOPC  | 50     | POPA | 25    | Cholesterol | 25 |                                                                                      |
| E4                                                          | DOPC  | 50     | POPE | 25    | Cholesterol | 25 |                                                                                      |
| E5                                                          | DOPC  | 50     | DOPC | 25    | Cholesterol | 25 |                                                                                      |

**Supplementary Table S4: Lipid composition of the GUVs and XRD samples.**

| ID  | Lamellar Lipid |                | Fusogenic Lipid |                | Sterol      |                | Notes          |
|-----|----------------|----------------|-----------------|----------------|-------------|----------------|----------------|
|     | Lipid Name     | Molar fraction | Lipid Name      | Molar fraction | Lipid Name  | Molar fraction |                |
| G0  | DLPC           | 50             | DOPE            | 25             | Cholesterol | 25             |                |
| G1  | DLPC/DOPC      | 25/25          | DOPE            | 25             | Cholesterol | 25             |                |
| G2  | DLPC/DOPC      | 16.67/33.33    | DOPE            | 25             | Cholesterol | 25             |                |
| G3  | DLPC/DOPC      | 12.5/37.5      | DOPE            | 25             | Cholesterol | 25             |                |
| G4  | DLPC/DOPC      | 10/40          | DOPE            | 25             | Cholesterol | 25             |                |
| G5  | DOPC           | 50             | DOPE            | 25             | Cholesterol | 25             | No GUVs formed |
| G6  | DPPC           | 50             | DOPE            | 25             | Cholesterol | 25             |                |
| G7  | DPPC/DOPC      | 25/25          | DOPE            | 25             | Cholesterol | 25             |                |
| G8  | DPPC/DOPC      | 16.67/33.33    | DOPE            | 25             | Cholesterol | 25             |                |
| G9  | DPPC/DOPC      | 12.5/37.5      | DOPE            | 25             | Cholesterol | 25             |                |
| G10 | DPPC/DOPC      | 10/40          | DOPE            | 25             | Cholesterol | 25             |                |

## References:

- 1 C. François-Martin and F. Pincet, *Sci. Rep.*, 2017, **7**, 43860.
- 2 A. J. Smith, S. G. Alcock, L. S. Davidson, J. H. Emmins, J. C. Hiller Bardsley, P. Holloway, M. Malfois, A. R. Marshall, C. L. Pizzey, S. E. Rogers, O. Shebanova, T. Snow, J. P. Sutter, E. P. Williams and N. J. Terrill, *J. Synchrotron Radiat.*, 2021, **28**, 939–947.
- 3 N. Kučerka, M. P. Nieh and J. Katsaras, *Biochim. Biophys. Acta - Biomembr.*, 2011, **1808**, 2761–2771.
- 4 N. Kučerka, Y. Liu, N. Chu, H. I. Petrache, S. Tristram-Nagle and J. F. Nagle, *Biophys. J.*, 2005, **88**, 2626–2637.
- 5 W. J. Sun, S. Tristram-Nagle, R. M. Suter and J. F. Nagle, *Biophys. J.*, 1996, **71**, 885–891.
- 6 B. Kollmitzer, P. Heftberger, M. Rappolt and G. Pabst, *Soft Matter*, 2013, **9**, 10877–10884.
- 7 E. E. Kooijman, V. Chupin, N. L. Fuller, M. M. Kozlov, B. De Kruijff, K. N. J. Burger and P. R. Rand, *Biochemistry*, 2005, **44**, 2097–2102.
